# Supplementary material for: Anisotropic organization of circumferential actomyosin characterizes hematopoietic stem cells emergence in the zebrafish
Source: eLife journal article supplement (doi:10.7554/elife.37355), 2018-08-21
Supplement: fig4-data1 [file elife-37355-fig4-data1-v1.pdf]

## Source Data

| EHT  |          |        |        |         |
|------|----------|--------|--------|---------|
|      |          | Length | Width  | Area    |
| Map2 | -        | 23,36  | 20,16  | 277,709 |
| Map3 | -        | 13,94  | 14,28  | 113,75  |
| Map3 | -        | 17     | 12,92  | 143,113 |
| Map4 | -        | 15,98  | 18,02  | 207,849 |
| Map5 | -        | 20,149 | 14,624 | 201,829 |
| Map5 | -        | 11,049 | 18,849 | 146,382 |
| Map5 | -        | 13,974 | 17,874 | 174,475 |
| Map6 | Figure 4 | 9,99   | 18,9   | 114,016 |

| Potentially Hemogenic |          |        |       |         |
|-----------------------|----------|--------|-------|---------|
|                       |          | Length | Width | Area    |
| Map1                  | Figure 3 | 35,2   | 14,08 | 326,451 |
| Map1                  | Figure 3 | 53,44  | 19,52 | 509,338 |
| Map2                  | -        | 67,2   | 22,4  | 718,95  |
| Map3                  | -        | 80,24  | 28,9  | 1109,65 |
| Map3                  | -        | 57,12  | 34    | 1058,09 |
| Map6                  | Figure 4 | 54,27  | 24,03 | 754,952 |
| Map6                  | Figure 4 | 54     | 19,44 | 533,191 |

|      |                   |
|------|-------------------|
| Map1 | Sequence          |
| Map2 | Sequence          |
| Map3 | Sequence          |
| Map4 | Single time point |
| Map5 | Sequence          |
| Map6 | Sequence          |

| Endothelial |          |        |        |          |
|-------------|----------|--------|--------|----------|
|             |          | Length | Width  | Area     |
| Map1        | Figure 3 | 48,64  | 38,72  | 1271,296 |
| Map1        | Figure 3 | 49,28  | 32,96  | 1044,173 |
| Map1        | Figure 3 | 59,52  | 50,24  | 1457,152 |
| Map1        | Figure 3 | 66,88  | 26,88  | 845,21   |
| Map1        | Figure 3 | 41,28  | 25,92  | 766,362  |
| Map1        | Figure 3 | 44,8   | 30,4   | 605,491  |
| Map1        | Figure 3 | 46,4   | 26,24  | 536,576  |
| Map3        | -        | 62,56  | 33,32  | 835,326  |
| Map3        | -        | 58,14  | 40,46  | 1145,018 |
| Map3        | -        | 54,4   | 47,6   | 1244,55  |
| Map3        | -        | 63,58  | 46,58  | 1467,542 |
| Map3        | -        | 71,74  | 36,72  | 1574,126 |
| Map3        | -        | 53,38  | 39,1   | 987,687  |
| Map4        | -        | 62,22  | 52,36  | 2118,602 |
| Map4        | -        | 51,68  | 57,46  | 1568,924 |
| Map4        | -        | 37,06  | 55,08  | 1196,114 |
| Map4        | -        | 93,5   | 77,18  | 2096,175 |
| Map5        | -        | 62,072 | 49,398 | 1267,902 |
| Map5        | -        | 43,873 | 35,423 | 974,294  |
| Map6        | Figure 4 | 40,77  | 43,74  | 968,112  |
| Map6        | Figure 4 | 54,54  | 54     | 1207,224 |
| Map6        | Figure 4 | 65,61  | 56,16  | 1556,123 |
| Map6        | Figure 4 | 56,43  | 57,24  | 1551,239 |
| Map6        | Figure 4 | 51,3   | 67,5   | 1823,229 |
| Map6        | Figure 4 | 79,65  | 31,86  | 1092,844 |
| Map6        | Figure 4 | 59,4   | 25,11  | 776,677  |

## Figure 4-source data 1

Figure 4D: Numerical data (width, length and area) and corresponding 2D-Maps with the contours of EHT cells (red), hemogenic cells (blue) and endothelial cells (green).

# Map1

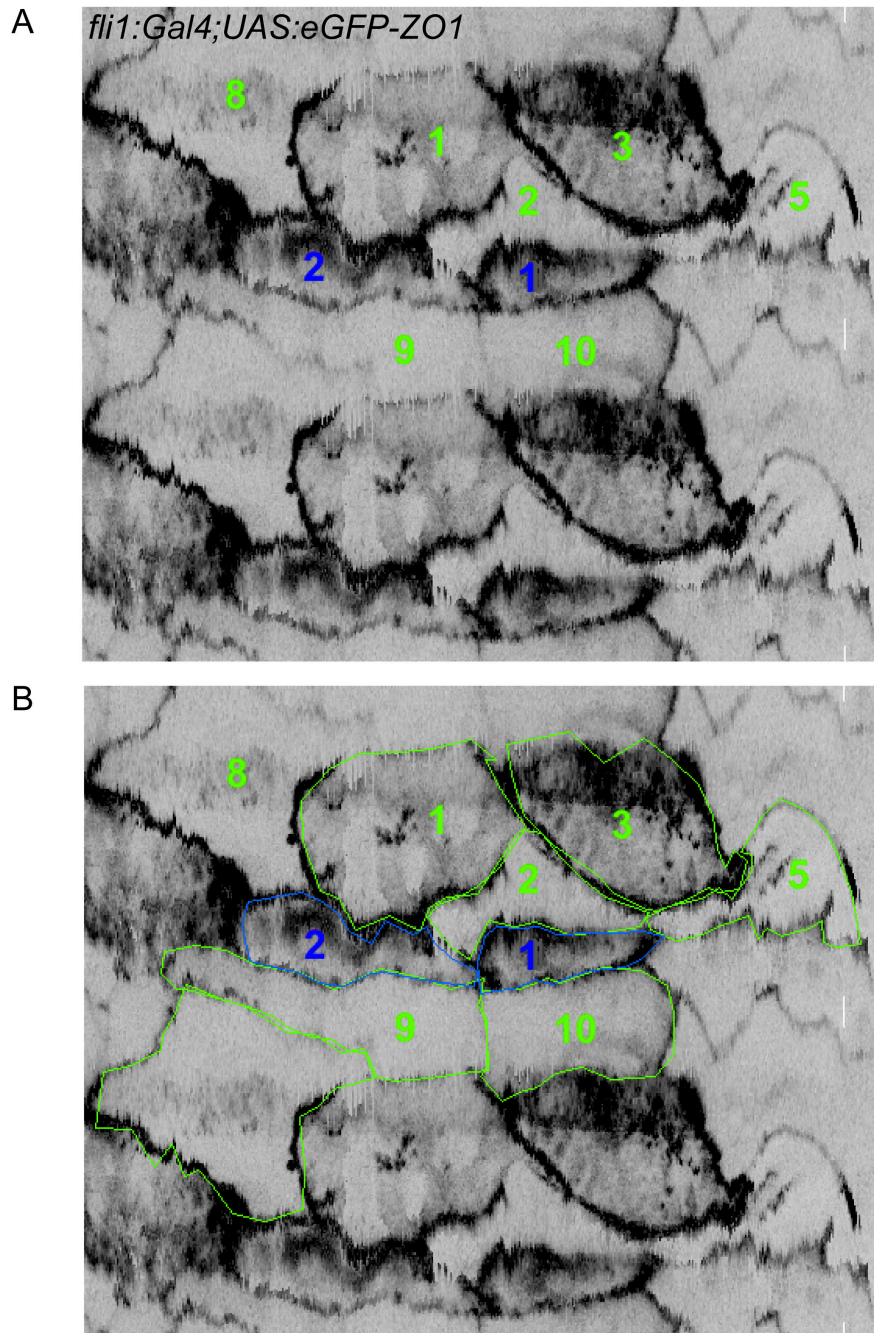

2D projection of DA portion extracted from a confocal TL sequence performed on a 48 hpf *Tg(fli1:Gal4;UAS:RFP; UAS:eGFP-ZO1)* embryo (related to Figure 4-D). (A) Cells numbered in blue and green correspond to “Potentially hemogenic” and “Endothelial” cells respectively. (B) Same image with the “Potentially hemogenic” and “Endothelial” cells contours delimited by hand.

## Map 2

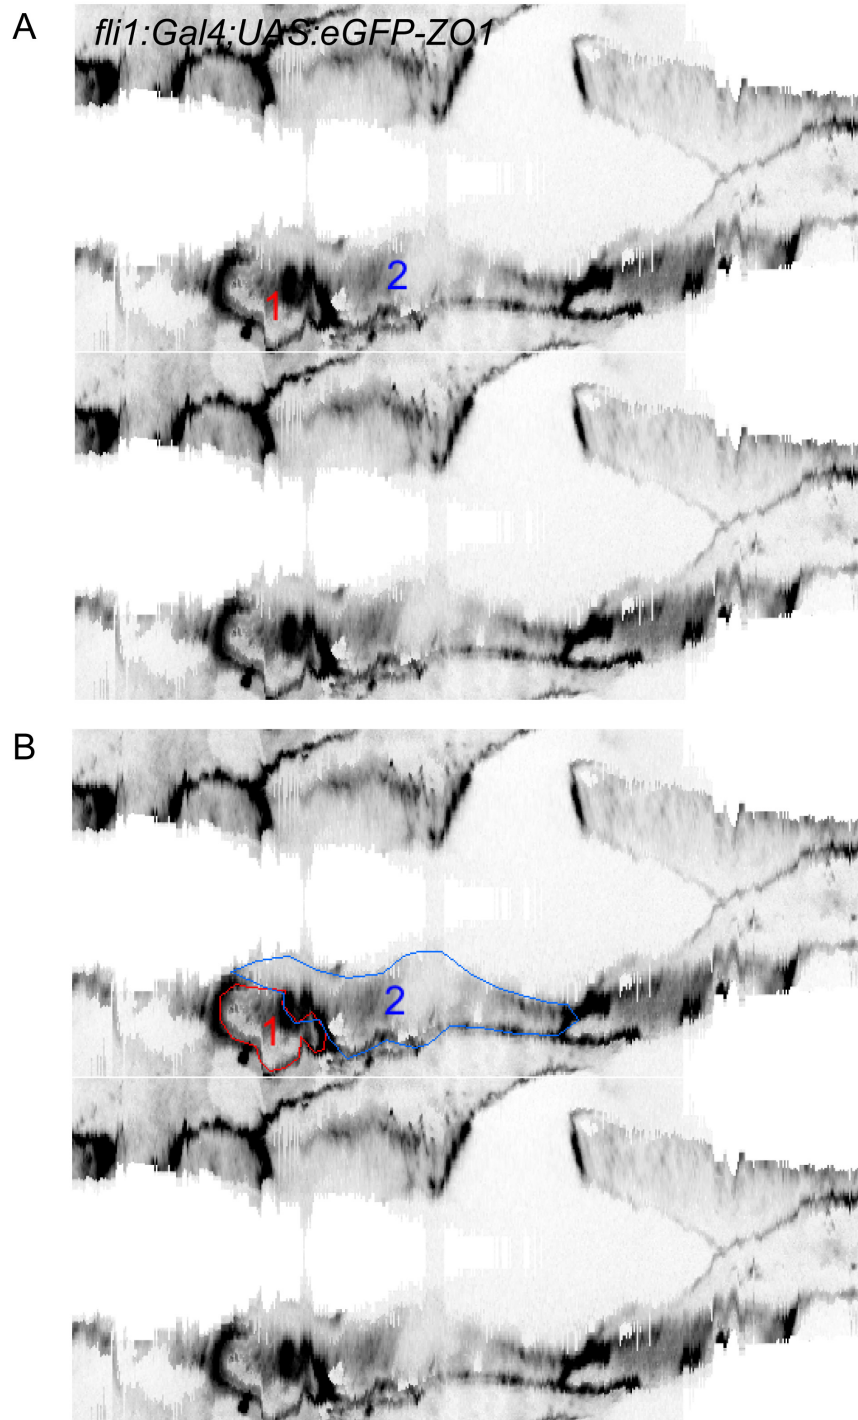

2D projection of DA portion extracted from a confocal TL sequence performed on a 48 hpf *Tg(fli1:Gal4;UAS:RFP; UAS:eGFP-ZO1)* embryo (related to Figure 4-D). (A) Cell numbered in red and blue correspond to “EHT” and “Potentially hemogenic” cells respectively. (B) Same image with the “EHT” and “Potentially hemogenic” cells contours delimited by hand.

Map 3

A

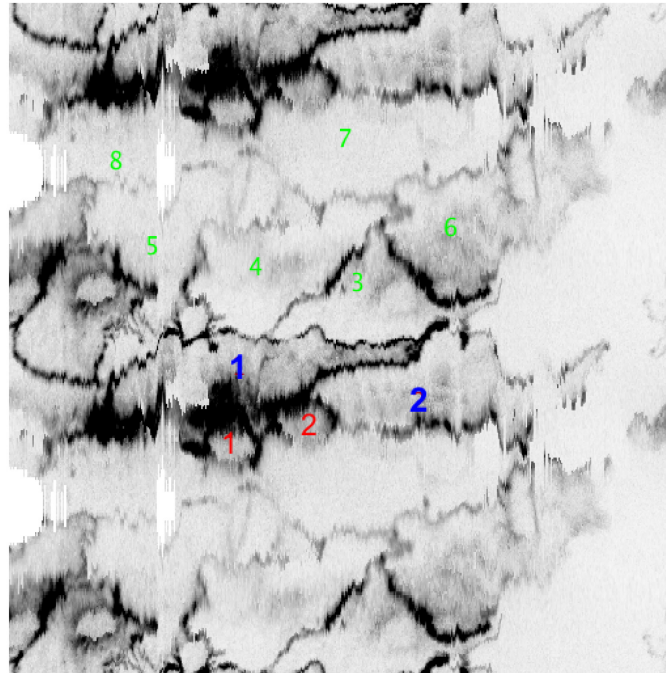

B

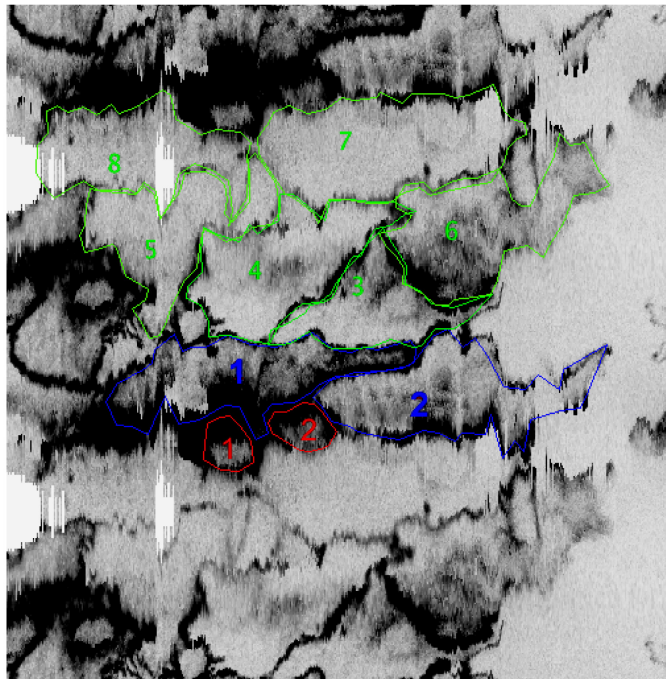

2D projection of DA portion extracted from a confocal TL sequence performed on a 48 hpf *Tg(fli1:Gal4;UAS:RFP; UAS:eGFP-ZO1)* embryo (related to Figure 4-D). (A) Cells numbered in red, blue and green correspond to “EHT”, “Potentially hemogenic” and “Endothelial” cells respectively. (B) Same image with the “EHT”, “Potentially hemogenic” and “EHT” cells contours delimited by hand.



## Map 4

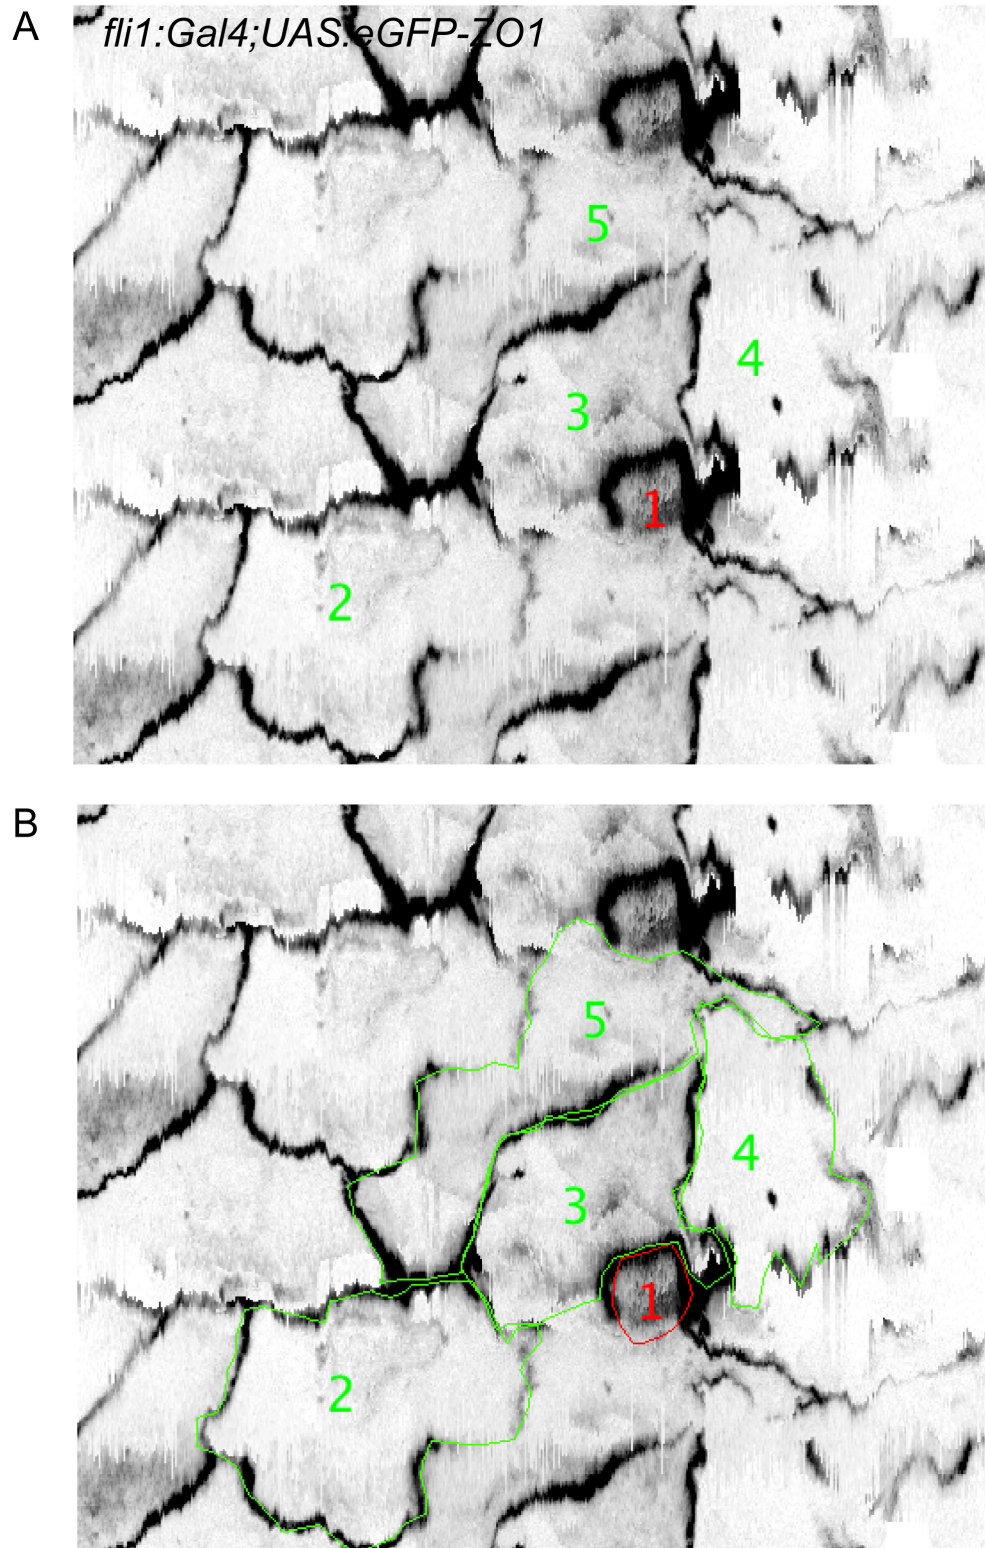

2D projection of DA portion extracted from a single confocal image performed on a 48 hpf *Tg(fli1:Gal4;UAS:RFP; UAS:eGFP-ZO1)* embryo (related to Figure 4-D). (A) Cell numbered in red and green correspond to “EHT” and “Endothelial” cells respectively. (B) Same image with the “EHT” and “EHT” cells contours delimited by hand.

## Map 5

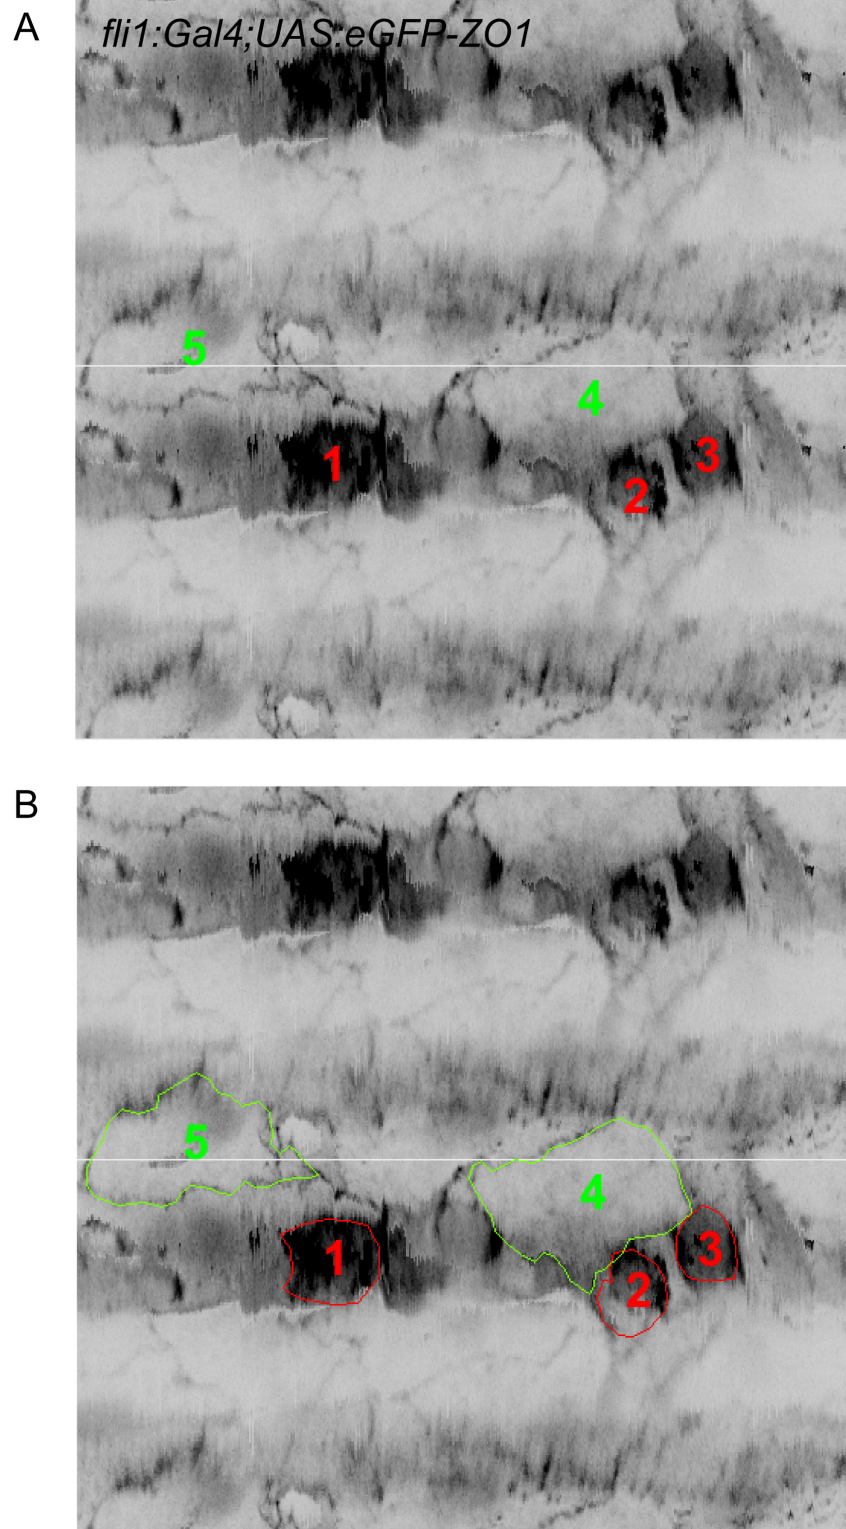

2D projection of DA portion extracted from a confocal TL sequence performed on a 48 hpf *Tg(fli1:Gal4;UAS:RFP; UAS:eGFP-ZO1)* embryo (related to Figure 4-D). (A) Cells numbered in red and green correspond to “EHT” and “Endothelial” cells respectively. (B) Same image with the “EHT” and “EHT” cells contours delimited by hand.

## Map 6

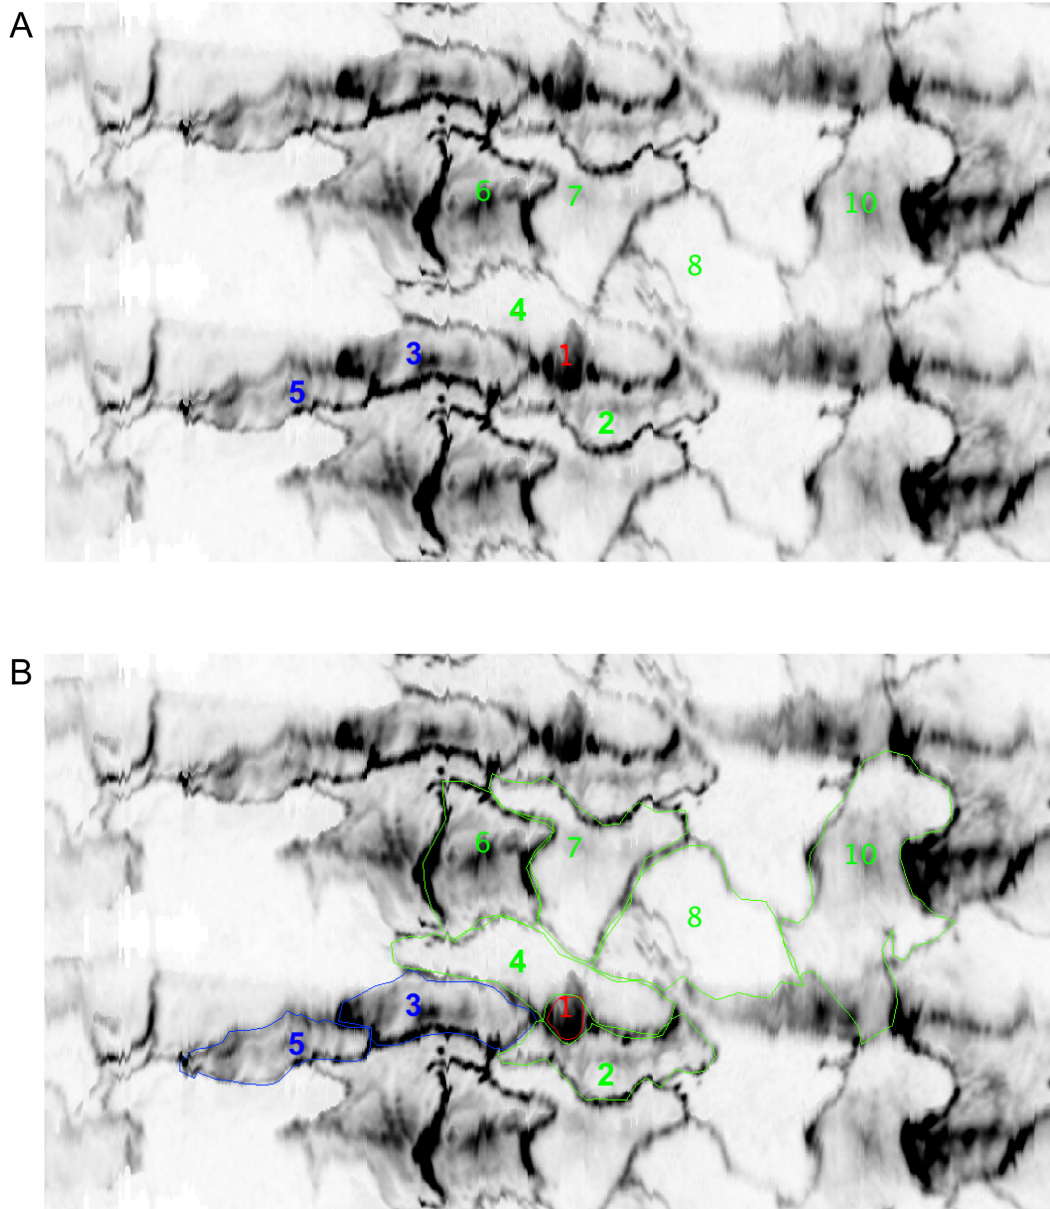

2D projection of DA portion extracted from a confocal TL sequence performed on a 48 hpf *Tg(fli1:Gal4;UAS:RFP; UAS:eGFP-ZO1)* embryo (related to Figure 4-D). (A) Cells numbered in red, blue and green correspond to “EHT”, “Potentially hemogenic” and “Endothelial” cells respectively. (B) Same image with the “EHT”, “Potentially hemogenic” and “EHT” cells contours delimited by hand.
