# Supplementary material for: Anisotropic organization of circumferential actomyosin characterizes hematopoietic stem cells emergence in the zebrafish
Source: eLife journal article supplement (doi:10.7554/elife.37355), 2018-08-21
Supplement: fig5-data1 [file elife-37355-fig5-data1-v1.pdf]

### Figure 5-source data 1

Figure 5A: Z-projections (on top) and full 2D-Maps (bottom) from which the images presented in the bottom panels of Figure 5A were extracted.

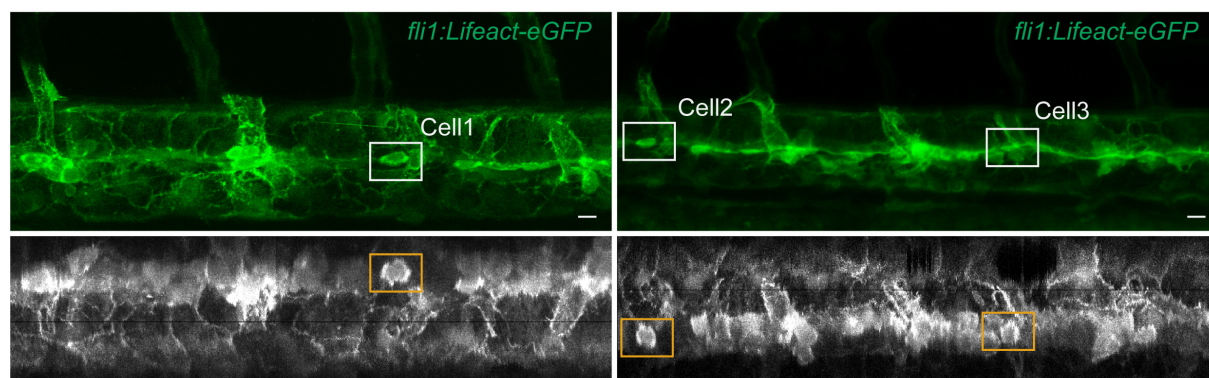

**Figure 5-source data 1:** Top panels; maximum projection of Z-planes extracted from a single confocal image obtained from a 48 hpf *Tg(fli1:Lifeact-eGFP)* embryo. Bottom panels have been obtained after duplication (x2) of the corresponding 2D-maps (see Methods). White (top) and yellow (bottom) rectangles point at Cells 1, 2 and 3 shown in Figure 5A (bottom panels). Scale bars, 10 $\mu$ m.
